# Supplementary material for: Variation of Structure and Cellular Functions of Type IA Topoisomerases across the Tree of Life
Source: MDPI journal article supplement (doi:10.3390/cells13060553), 2024-03-21
Supplement: s1 [file s1]

### Topo III

|                                  |            |    |              |     |             |
|----------------------------------|------------|----|--------------|-----|-------------|
| <i>Sulfolobus solfataricus</i>   | Q97ZJ8     | 11 | LIIAEKSKAAKK | 314 | GLISYPRTNS  |
| <i>Nanoarchaeum equitans</i>     | Q74N66     | 2  | IIIAEKPSVAKR | 289 | GYISYPRTSS  |
| <i>Methanosarcina mazei</i>      | A0A0E3PWI6 | 4  | VAFAEKNKAAQ  | 313 | GFTSYPRSTET |
| <i>Methanosarcina mazei</i>      | A0A0E3PXP2 | 3  | LIVTEKNIAARR | 313 | GYISYPRTDN  |
| <i>Thermoplasma volcanium</i>    | Q97CT2     | 7  | VIIAEKVDAGR  | 309 | GLISYPRTDN  |
| <i>Haloferax volcanii</i>        | A0A384LCM2 | 7  | LIITEKDNAARR | 322 | GYITYPRTDN  |
| <i>Escherichia coli</i>          | P14294     | 3  | LFIAEKPSLARA | 324 | KLITYPRSDC  |
| <i>Neisseria gonorrhoeae</i>     | Q5EP76     | 3  | LFLCEKPSQAKD | 318 | KITSYPRTPC  |
| <i>Neisseria gonorrhoeae</i>     | A0A7H9WG49 | 5  | LIIAEKPDMAKS | 297 | KVLTYPRSDF  |
| <i>Saccharomyces cerevisiae</i>  | P13099     | 4  | LCVAEKNSIAKA | 352 | GFISYPRTET  |
| <i>Ustilago maydis</i>           | A0A0D1C790 | 4  | LCVAEKPSIAKS | 342 | GFLSYPRSTET |
| <i>Choanephora cucurbitarum</i>  | A0A1C7N0U0 | 4  | LCVAEKPSAAKK | 327 | GLISYPRTET  |
| <i>Choanephora cucurbitarum</i>  | A0A1C7NLX2 | 7  | LMVAEKPSLAES | 333 | GYISYPRTET  |
| <i>Trypanosoma brucei brucei</i> | Q383X7     | 5  | LNVAEKPSVARE | 320 | GYISYPRTET  |
| <i>Trypanosoma brucei brucei</i> | Q384B1     | 5  | LMVAEKPSIAES | 322 | GYISYPRTES  |
| <i>Giardia intestinalis</i>      | V6TB71     | 6  | LCVTEKNSVAAE | 405 | GLISYPRTET  |
| <i>Giardia intestinalis</i>      | V6TB61     | 3  | LLIAEKPSIAEM | 324 | GYISYPRTES  |
| <i>Arabidopsis thaliana</i>      | Q9LVP1     | 12 | LNVAEKPSVAKS | 338 | GFISYPRTET  |
| <i>Arabidopsis thaliana</i>      | F4ISQ7     | 8  | LMVAEKPSIALS | 327 | GFISYPRTES  |
| <i>Homo sapiens</i>              | Q13472     | 37 | LCVAEKNDAAKG | 358 | GYISYPRTET  |
| <i>Homo sapiens</i>              | O95985     | 5  | LMVAEKPSLAQS | 332 | GYISYPRTET  |

### Topo I

|                                   |            |    |               |     |            |
|-----------------------------------|------------|----|---------------|-----|------------|
| <i>Thermoplasmatales archaeon</i> | A0A2P6VYX4 | 6  | LVIVESPAKVD   | 321 | GHITYMRTDS |
| <i>Thermoplasmatales archaeon</i> | A0A2P6VTI6 | 4  | VIVVESGAKTRT  | 300 | ALITYMRTDS |
| <i>Thermotoga maritima</i>        | P46799     | 8  | YIVVESPAKAKT  | 284 | AFITYMRTDS |
| <i>Mycobacterium tuberculosis</i> | P9WG49     | 20 | LVIVESPTKARK  | 338 | GYITYMRTDS |
| <i>Deinococcus radiodurans</i>    | Q9RUL0     | 48 | LVIVESPAKAKT  | 365 | GYITYMRTDS |
| <i>Agrobacterium tumefaciens</i>  | A9CJ93     | 3  | VVVVESPAKAKT  | 299 | GLITYMRTDG |
| <i>Caulobacter crescentus</i>     | Q9A5J6     | 3  | VVVVESPAKAKT  | 298 | GLITYMRTDG |
| <i>Neisseria gonorrhoeae</i>      | A0A7H9WPJ8 | 5  | LLIVESPSKAKT  | 300 | GLITYMRTDS |
| <i>Helicobacter pylori</i>        | A0A402E4A0 | 4  | LIIVESPAKAKT  | 293 | GVITYMRTDS |
| <i>Helicobacter pylori</i>        | A0A402E2T6 | 5  | VIIIIESPNKVAK | 290 | GLITYIRTDA |
| <i>Helicobacter pylori</i>        | A0A402E598 | 6  | VFIIENPNKIAK  | 297 | GLITYIRTDS |
| <i>Pseudomonas aeruginosa</i>     | A0A431XC87 | 5  | LVIVESPAKAKT  | 320 | GYITYMRTDS |
| <i>Pseudomonas aeruginosa</i>     | A0A431X2A2 | 3  | LVIIIEAPGKLKK | 294 | GLITYHRTDN |

### Reverse gyrase

|                                |            |     |               |     |            |
|--------------------------------|------------|-----|---------------|-----|------------|
| <i>Sulfolobus solfataricus</i> | Q97ZZ8     | 621 | LFIVESPNKAKT  | 961 | GLITYHRTDS |
| <i>Sulfolobus solfataricus</i> | Q97ZF5     | 583 | LLIVESPTKAKT  | 899 | GLITYHRTDS |
| <i>Nanoarchaeum equitans</i>   | Q74MA4     | 43  | LFIVESPNKART  | 348 | GLITYHRTDS |
| <i>Methanopyrus kandleri</i>   | Q49600     | 781 | LMIVESPNKARM  |     |            |
|                                | Q8TYK7     |     |               | 74  | GLITYHRTDS |
| <i>Pyrococcus abyssi</i>       | Q9UZ86     | 641 | LMIVESPNKART  | 951 | GLCTYHRTDS |
| <i>Conexivisphaera calida</i>  | A0A4P2VAE5 | 658 | LLLIVESPTKART | 986 | GLITYHRTDS |
| <i>Thermotoga maritima</i>     | O51934     | 544 | LIIVESPTKAET  | 847 | GFITYHRTDS |

### Mitochondrial Topo IA

|                                  |        |     |              |     |            |
|----------------------------------|--------|-----|--------------|-----|------------|
| <i>Trypanosoma brucei brucei</i> | Q38C52 | 12  | LVIVESPNKVIK | 358 | GHITYPRTDS |
| <i>Arabidopsis thaliana</i>      | F4JRX3 | 476 | VIVVESMTKAKI | 775 | GLITYMRTDG |

**Figure S1. Alignment of type IA topoisomerase active site region residues.** Residues around the first strictly conserved TOPRIM glutamate and the catalytic tyrosine for formation of the covalent intermediate are shown here. Archaeal sequences are highlighted in yellow. Residues conserved in all type IA topoisomerases are shown in red. A lysine that always follows the conserved TOPRIM glutamate in topo III sequences is shown in green.
